# Supplementary material for: MicroRNA-214 regulates smooth muscle cell differentiation from stem cells by targeting RNA-binding protein QKI
Source: PubMed Central journal article supplement (PMC5386729; doi:10.18632/oncotarget.15189), 2017-02-08
Supplement: oncotarget-08-19866-s001.pdf [file oncotarget-08-19866-s001.pdf]

## MicroRNA-214 regulates smooth muscle cell differentiation from stem cells by targeting RNA-binding protein QKI

### SUPPLEMENTARY TABLE

Supplementary Table 1: Primer sets used in the present study

| Gene names        | Forward (5'-3')            | Reverse (5'-3')            | Application                         |
|-------------------|----------------------------|----------------------------|-------------------------------------|
| 18s               | CCCAGTAAGTGC GG GTCATAA    | CCGAGGGCCTCACTAAACC        | Real-time RT-PCR                    |
| U6 snoRNA         | CCATACCACCCTGGAAACGC       | TACTAACCGAGCCCCGACCCT      | Real-time RT-PCR                    |
| miR-214 (mu)      | AACTGGTGTCTGTGGAGTCGGC     | GGCCTGGCTGGACAGAGTTG       | Real-time RT-PCR                    |
| SM $\alpha$ A     | TCCTGACGCTGAAGTATCCGAT     | GGCCACACGAAGCTCGTTATAG     | Real-time RT-PCR                    |
| SM22 $\alpha$     | GAT ATG GCA GCA GTG CAG AG | AGT TGG CTG TCT GTG AAG TC | Real-time RT-PCR                    |
| h1-Calponin       | GGT CCT GCC TAC GGC TTG TC | TCG CAA AGA ATG ATC CCG TC | Real-time RT-PCR                    |
| SM-myh11          | AAG CAG CCA GCA TCA AGG AG | AGC TCT GCC ATG TCC TCC AC | Real-time RT-PCR                    |
| SRF               | CCTACCAGGTGTCGGAATCTGA     | TCTGGATTGTGGAGGTGGTACC     | Real-time RT-PCR                    |
| Myocd             | TCAATGAGAAGATCGCTCTCCG     | GTCATCCTCAAAGGCCGAATGC     | Real-time RT-PCR                    |
| MEF2C             | AAGCCAAATCTCCTCCCCCTAT     | TGATTCCTGATGGCATCGTGT      | Real-time RT-PCR                    |
| QKI               | TACAGACCGCTGTCATGC         | TGGTGCCAATGTGTAGGG         | Real-time RT-PCR                    |
| SM $\alpha$ A-P1  | CATAACGAGCTGAGCTGCCTC      | CCAAACAAGGAGCAAAGACG       | CHIP assay<br>(with CArG region)    |
| SM $\alpha$ A-P2  | GATCAGAGCAAGGGGCTATA       | CTACTTACCCTGACAGCGAC       | CHIP assay<br>(without CArG region) |
| SM22 $\alpha$ -P1 | GCAGGTTCTTTGTCTGGGCCA      | CTGCTTGGCTCACCACCCCG       | CHIP assay<br>(with CArG region)    |
| SM22 $\alpha$ -P2 | CTTTAAACCCCTCACCCAGC       | ATGACTTGCACTTACAAGG        | CHIP assay<br>(without CArG region) |
| SRF-P_F2/R2       | CCTGGCTGGCTTGGCACTCAC      | ATCTGGCCGGACGGTGTGATA      | CHIP assay                          |
| SRF-P_F4/R4       | CCCTCTTCTGCCCTGCAGTCCT     | CCGCGATTCCGTGGGAGGGA       | CHIP assay<br>(Adjacent region)     |
| MEF2c-P_F1/R1     | AGTCAGGACAGTGGCTTAGCGT     | CGGGTTAGTCTCTGACAGTGGACC   | CHIP assay                          |
| MEF2c-P_F4/R4     | GCTCCAGTGTGCGATGTGCCA      | TCCGCAGCAAGCCAGTTTCC       | CHIP assay<br>(Adjacent region)     |
| Myocd-P_F1/R1     | AGGCAGCCTGTTGTAGGCTCG      | GAGAGGAGGTGGAGCCCTGCT      | CHIP assay<br>(Adjacent region)     |
| Myocd-P_F3/R3     | CGGGAGTTGCAAGCCAACCCA      | TCCCCAGCTTACTGCAGGGCT      | CHIP assay                          |
